# Supplementary material
Source: publisher site journal article supplement (https://www.dovepress.com/article/250796)
Supplement: Supplementary file 1 [file get_supplementary_file.php]

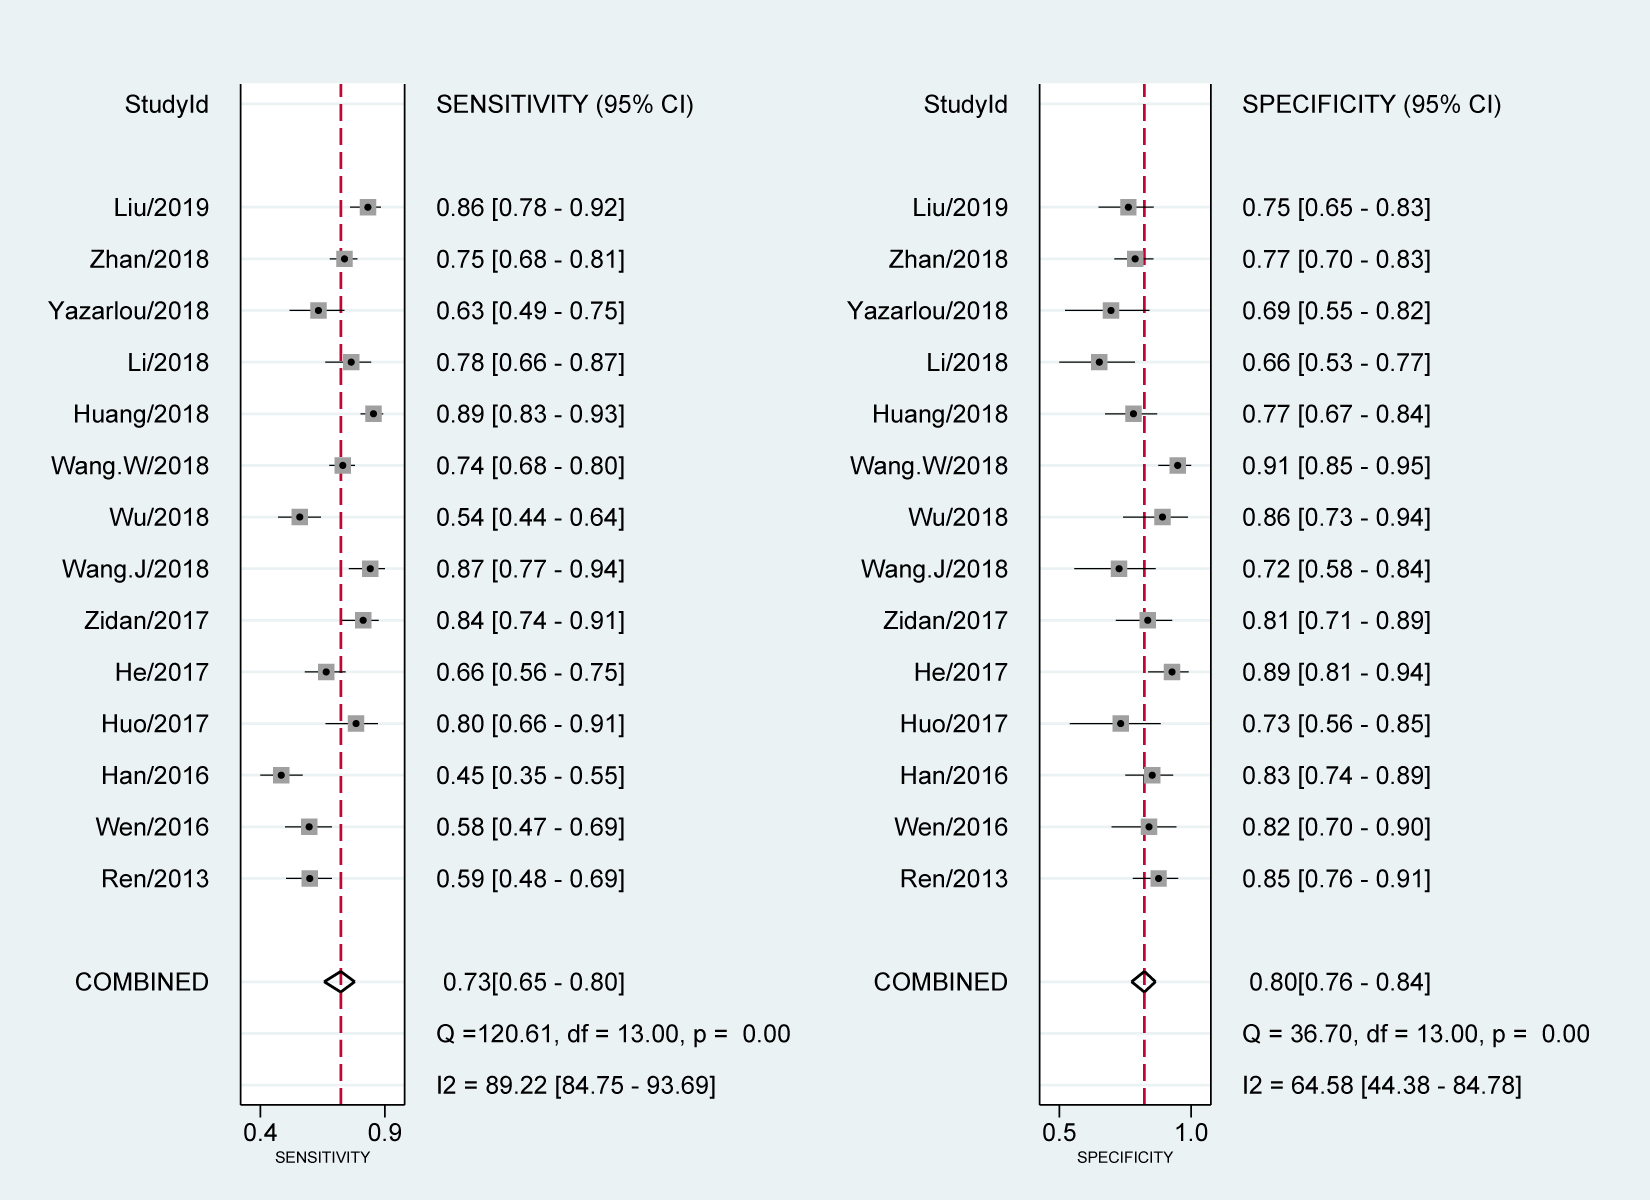


**Supplementary Figure 1**. Forest plots of pooled sensitivity and specificity of included studies after exclusion of 3 outlier.


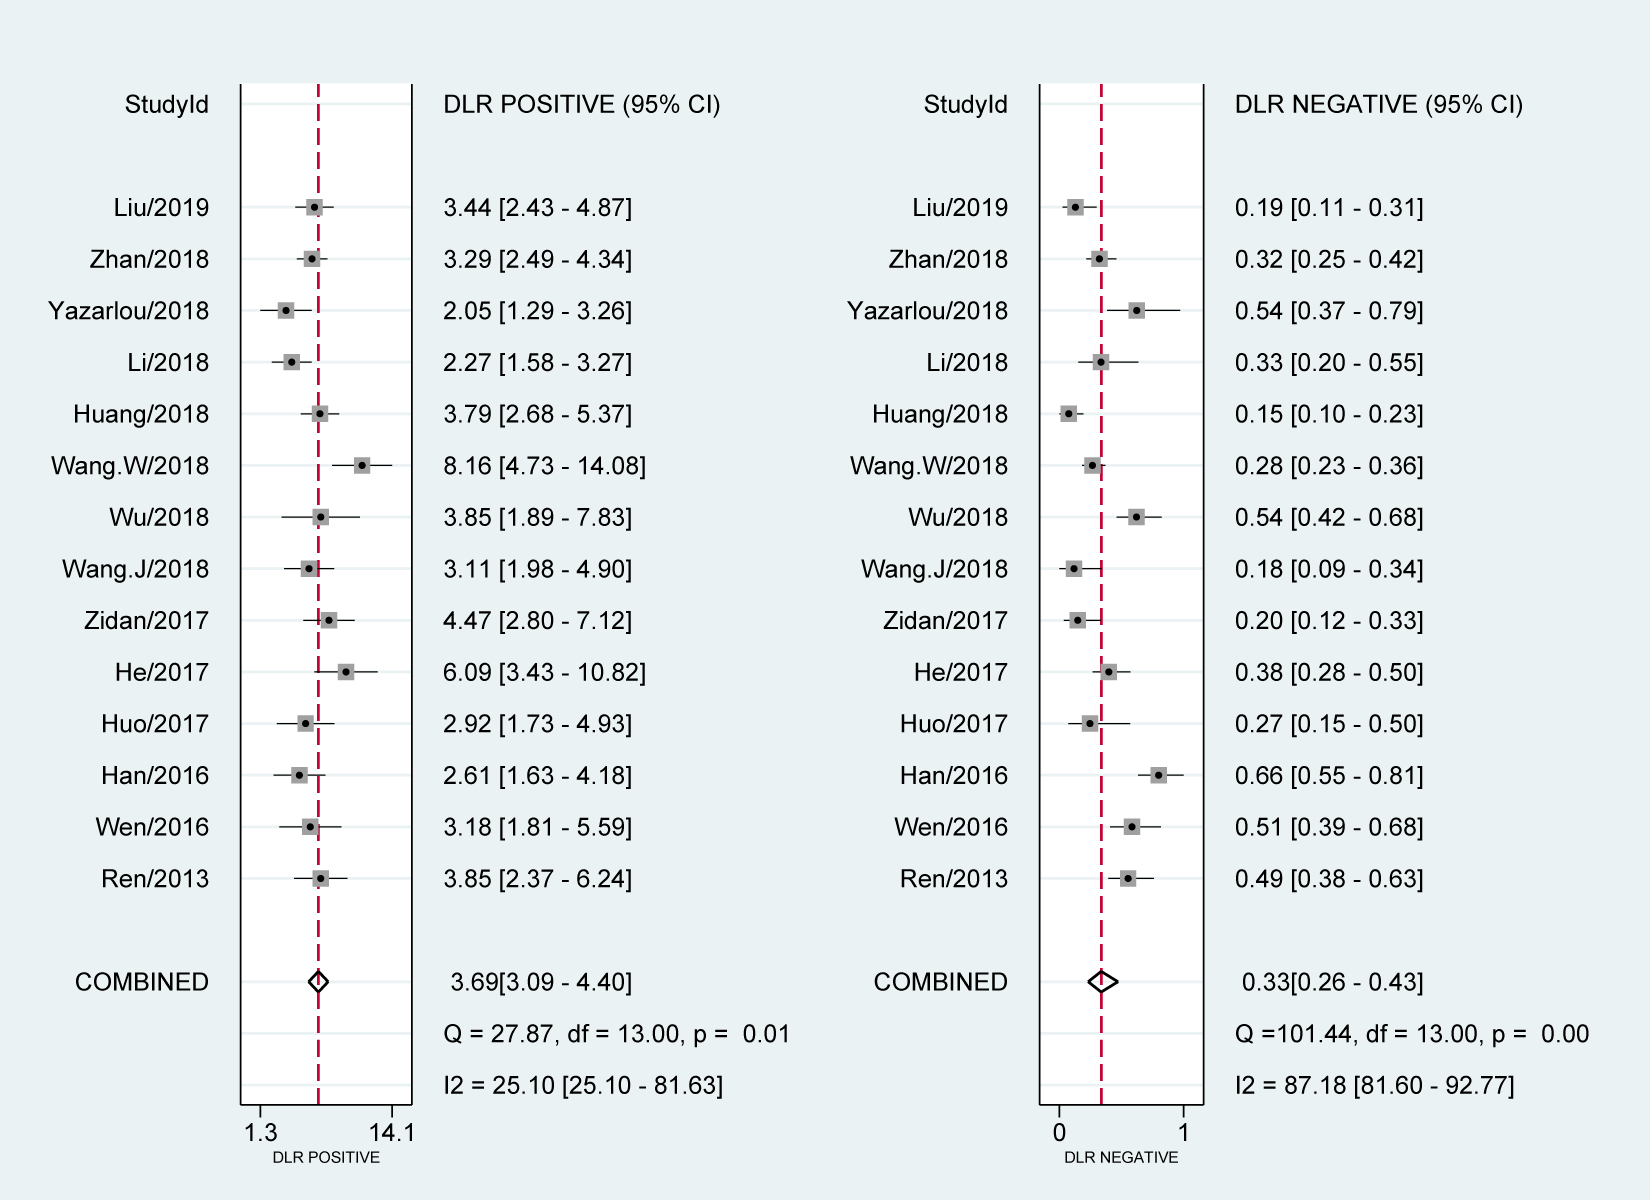


**Supplementary Figure 2**. Forest plots of pooled positive likelihood ratio (PLR) and negative likelihood ratio (NLR) of included studies after exclusion of 3 outlier.


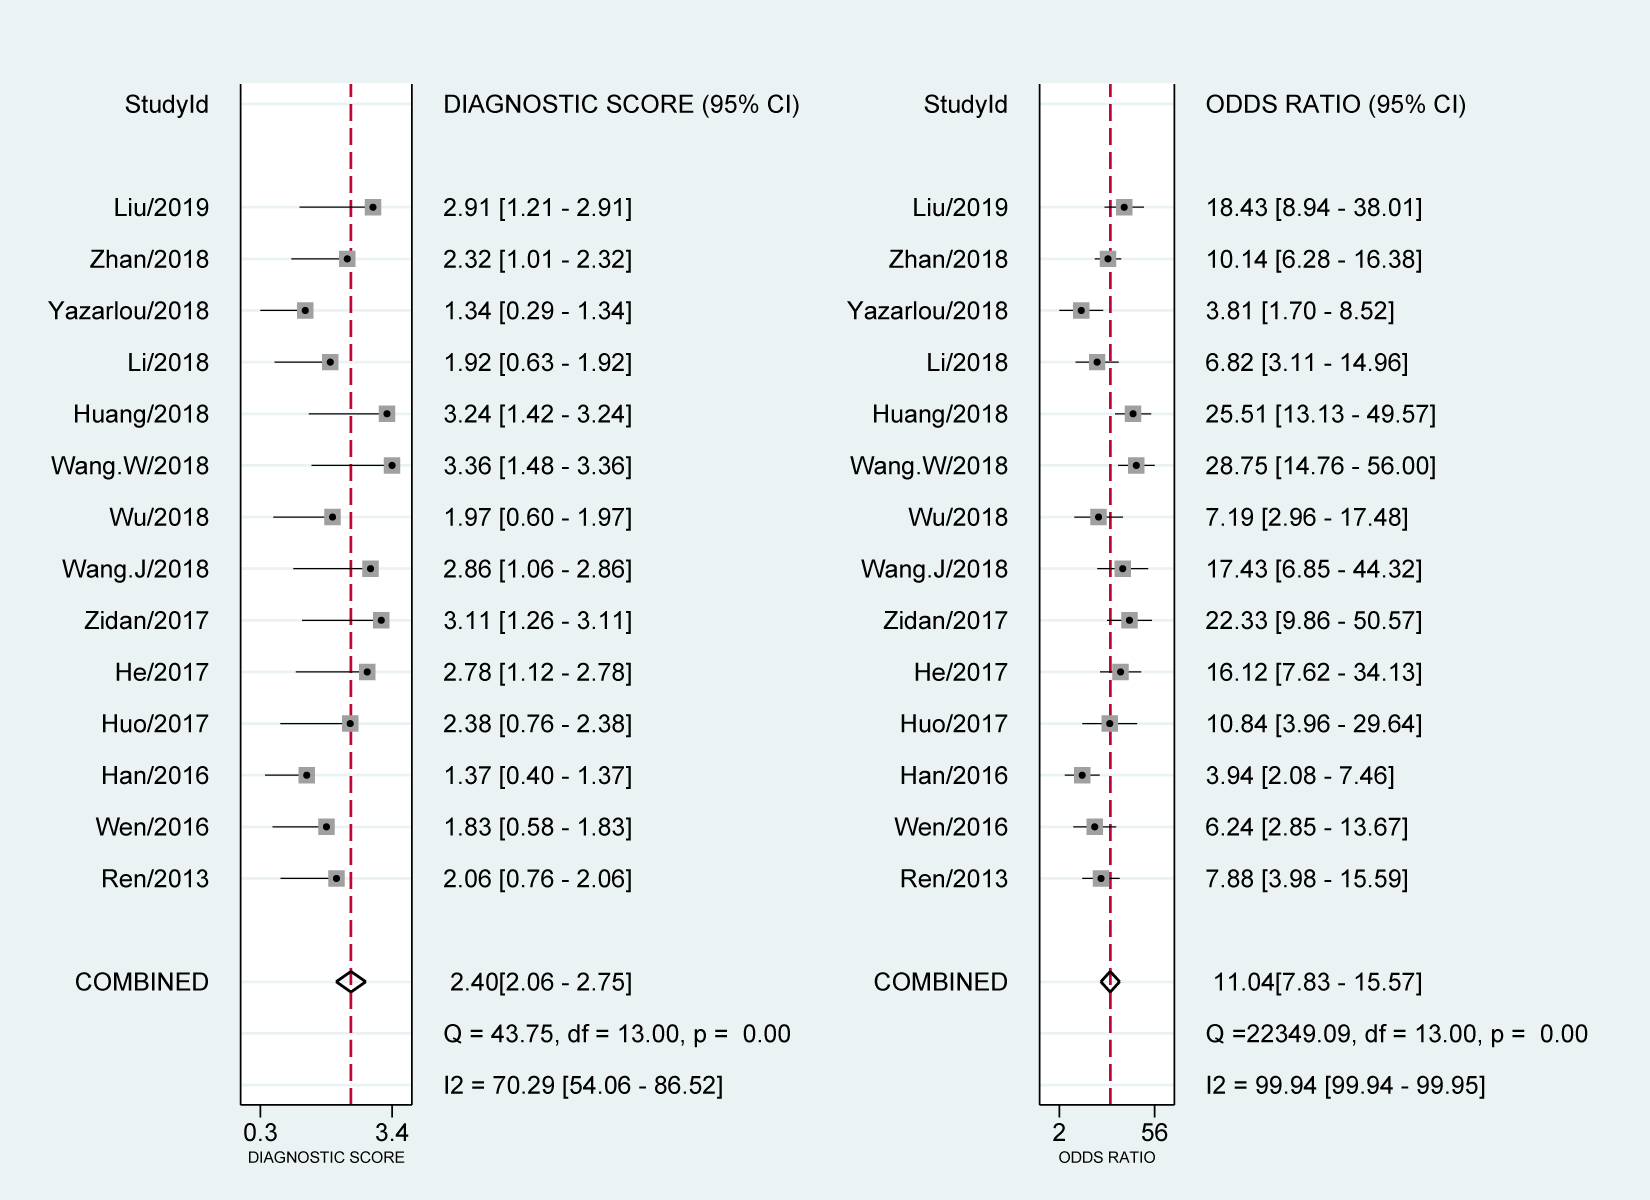


**Supplementary Figure 3**. Forest plots of pooled pooled diagnostic score (DS) and diagnostic odds ratio (DOR) of included studies after exclusion of 3 outlier.


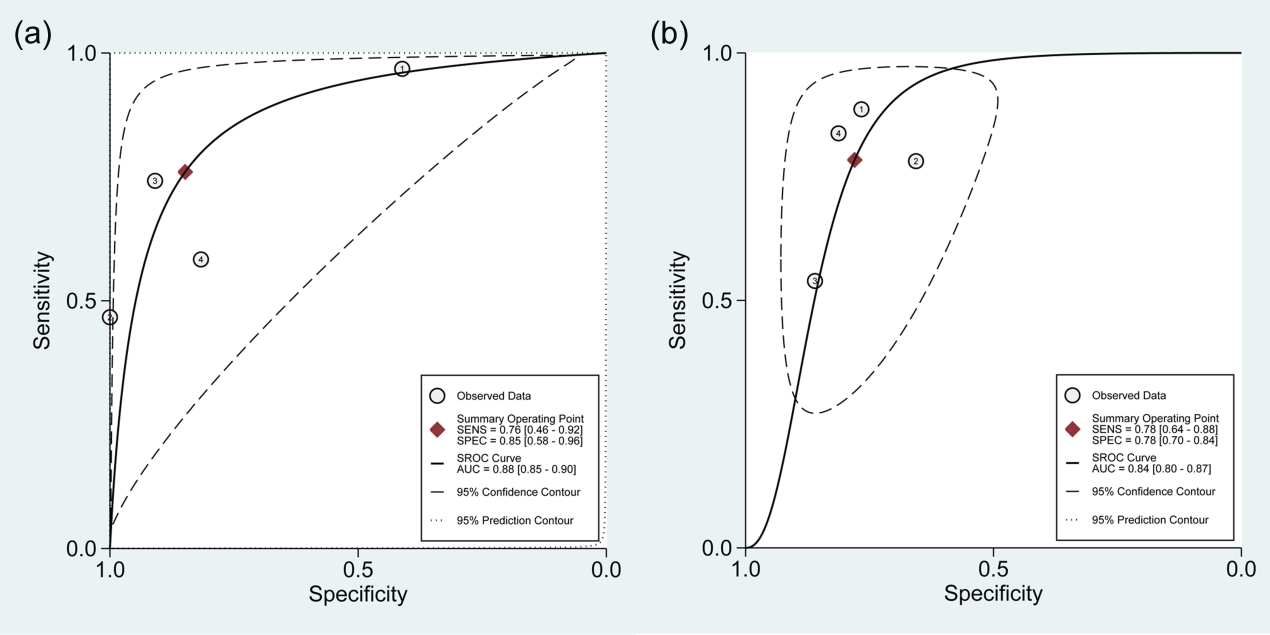


**Supplementary Figure 4**. Summary receiver operating characteristic (SROC) graph of included subgroup studies: (a) lung cancer, (b) breast cancer.


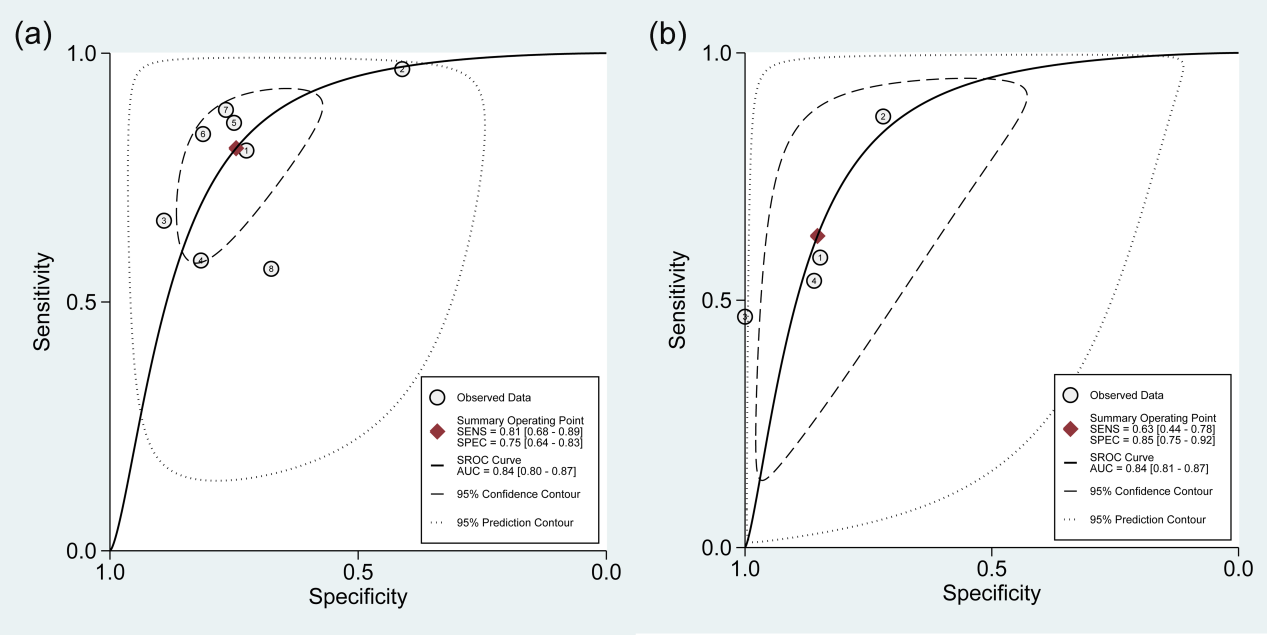


**Supplementary Figure 5**. Summary receiver operating characteristic (SROC) graph of included subgroup studies: (a) serum, (b) plasma.

| Supplementary Table 1: Subgroup analysis of MALAT1 as a biomarker for cancer diagnosis according to cancer type | | | | |
| --- | --- | --- | --- | --- |
| Diagnostic reference | Lung cancer | I-square | Breast cancer | I-square |
| Sen | 0.76 [0.46-0.92] | 95.76 [93.04-98.48] | 0.78 [0.64-0.88] | 93.31 [88.41-98.21] |
| Sep | 0.85 [0.58-0.96] | 96.53 [94.43-98.62] | 0.78 [0.70-0.84] | 61.25 [18.88-100.00] |
| PLR | 5.02 [1.96-12.87] | 90.41 [90.4-98.29] | 3.65 [2.66-4.78] | 3.35 [3.35-100.00] |
| NLR | 0.28 [0.12-0.65] | 90.09 [82.00-98.19] | 0.28 [0.16-0.47] | 91.35 [84.53-98.16] |
| DS | 2.88 [2.13-3.62] | 86.21 [73.94-98.49] | 2.55 [1.89-3.22] | 74.50 [48.38-100.00] |
| DOR | 17.73 [8.45-37.21] | 100.00 [100.00-100.00] | 12.86 [6.61-25.00] | 99.61 [99.50-99.73] |

| Supplementary Table 2: Subgroup analysis of MALAT1 as a biomarker for cancer diagnosis according to sample type | | | | |
| --- | --- | --- | --- | --- |
| Diagnostic reference | serum | I-square | Plasma | I-square |
| Sen | 0.81 [0.68-0.89] | 93.70 [90.68-96.72] | 0.63 [0.44-0.78] | 88.72 [79.18-98.26] |
| Sep | 0.75 [0.64-0.83] | 90.73 [85.76-95.71] | 0.85 [0.75-0.92] | 71.09 [40.78-100.00] |
| PLR | 3.18 [2.36-4.29] | 84.94 [84.94-95.56] | 4.29 [2.91-6.33] | 0.00 [0.00-100.00] |
| NLR | 0.26 [0.16-0.42] | 91.79 [87.54-96.05] | 0.43 [0.29-0.65] | 75.90 [51.48-100.00] |
| DS | 2.52 [1.97-3.07] | 83.68 [73.42-93.93] | 2.29 [1.79-2.79] | 17.59 [0.00-100.00] |
| DOR | 12.43 [7.18-21.52] | 100.00 [100.00-100.00] | 9.90 [6.01-16.29] | 78.74 [57.77-99.71] |
